# Supplementary material for: Novel Genes Affecting Blood Pressure Detected Via Gene-Based Association Analysis
Source: PubMed Central journal article supplement (PMC4478534; doi:10.1534/g3.115.016915), 2015-03-26
Supplement: supp_g3.115.016915_016915SI.pdf [file supp_g3.115.016915_016915SI.pdf]

**Novel genes affecting blood pressure detected via gene-based  
association analysis**

Huan Zhang<sup>§,†,#</sup>, Xing-Bo Mo<sup>§,†,‡,#</sup>, Tan Xu<sup>§,†</sup>, Xiao-Qing Bu<sup>§,†</sup>, Shu-Feng Lei<sup>§,†,‡</sup>,

Yong-Hong Zhang<sup>§,†,\*</sup>

<sup>§</sup>.Jiangsu Key Laboratory of Preventive and Translational Medicine for Geriatric Diseases, Soochow University, Suzhou, Jiangsu, P. R. China

<sup>†</sup>.Department of Epidemiology, School of Public Health, Medical College of Soochow University, Suzhou, Jiangsu, P. R. China

<sup>‡</sup>.Center for Genetic Epidemiology and Genomics, School of Public Health, Medical College of Soochow University, Suzhou, Jiangsu, P. R. China

<sup>#</sup>These authors contributed equally to this work.

\*Corresponding author: Yong-Hong Zhang, Ph.D. Address: 199 Renai Road, Suzhou Industrial Park, Suzhou, Jiangsu 215123, P. R. China

Email: yhzhang@suda.edu.cn. Tel/FAX: +86-512-65882625.

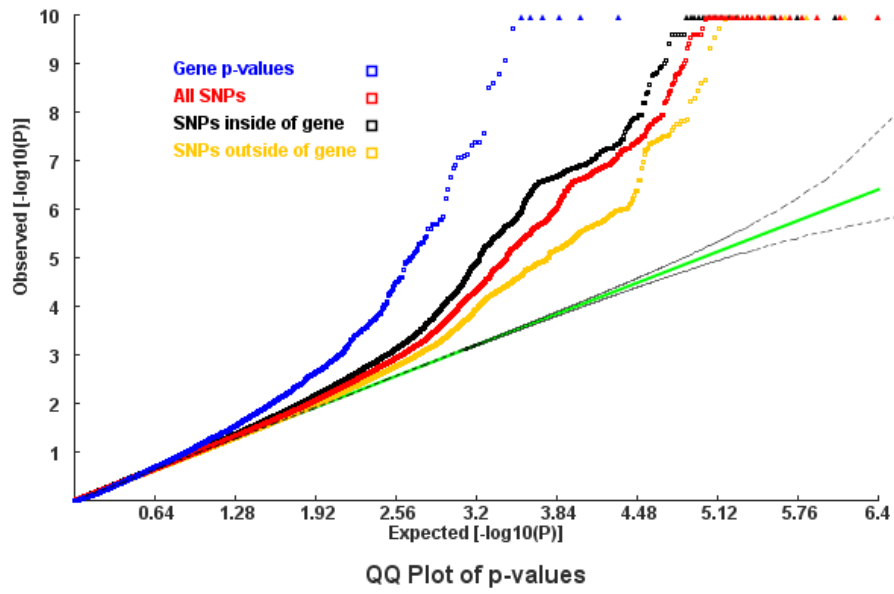

Figure S1 QQ plot of genes and SNPs for DBP (ICBP GWAS data).

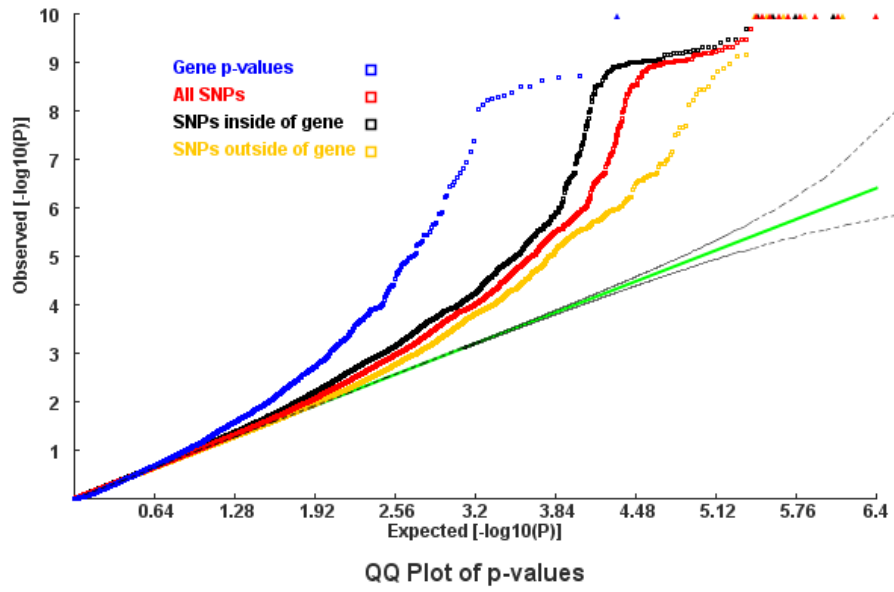

Figure S2 QQ plot of genes and SNPs for SBP (ICBP GWAS data).

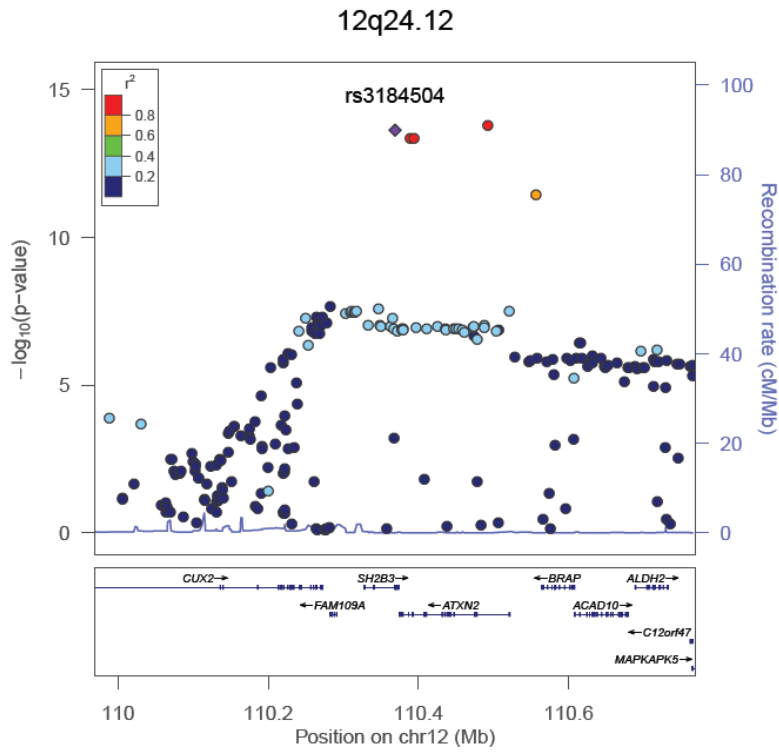

Figure S3 Regional association plot for DBP at 12q24.12 (ICBP GWAS data)  
*CUX2*, *ACAD10* were unreported genes in this region with gene-based P value  $< 2.3 \times 10^{-6}$ .

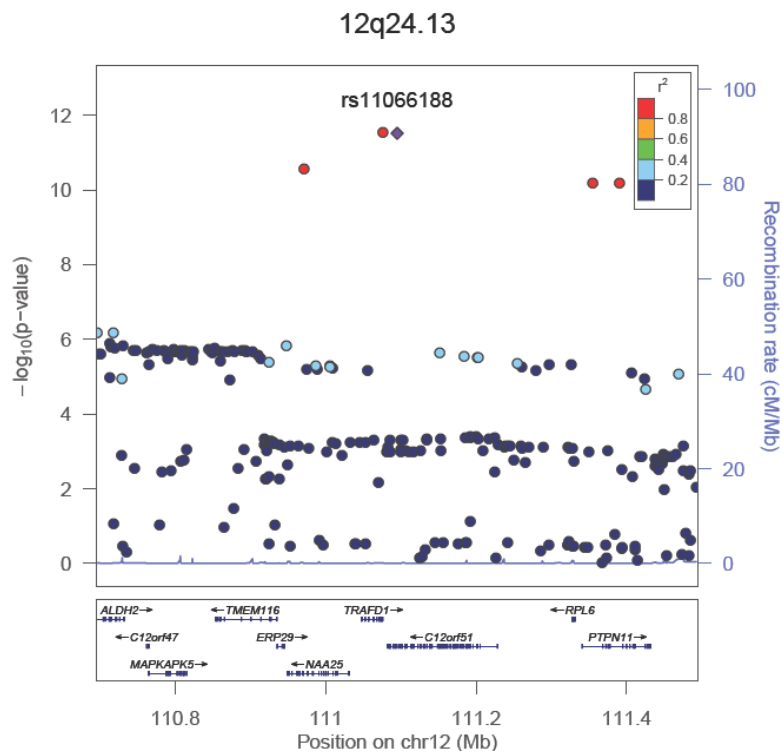

Figure S4 Regional association plot for DBP at 12q24.13 (ICBP GWAS data)  
*ADAMIA*, *MAPKAPK5*, *NAA25*, *TRAFD1* were unreported genes in this region with gene-based P value  $< 2.3 \times 10^{-6}$ .

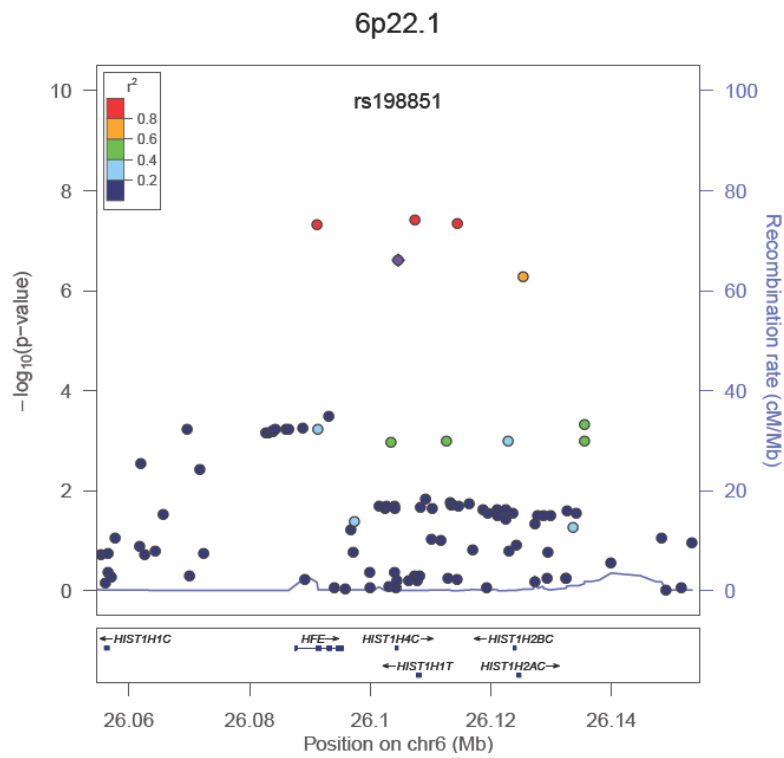

Figure S5 Regional association plot for DBP at 6p22.1 (ICBP GWAS data)  
*HIST1H4C* was unreported genes in this region with gene-based P value  $< 2.3 \times 10^{-6}$ .

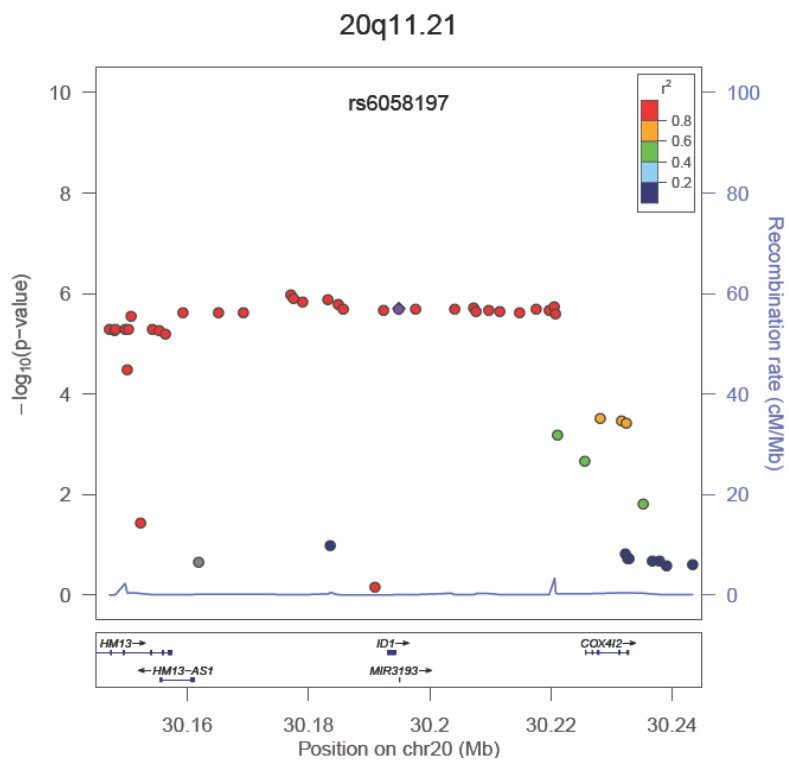

Figure S6 Regional association plot for DBP at 20q11.21 (ICBP GWAS data)  
*ID1*, *MIR3193* were unreported genes in this region with gene-based P value  $< 2.3 \times 10^{-6}$ .

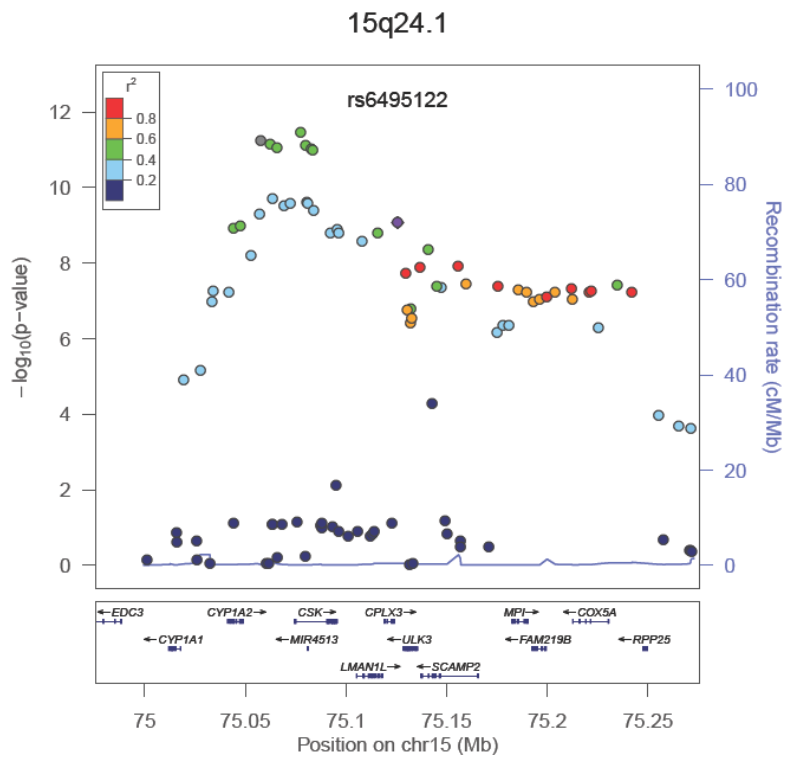

Figure S7 Regional association plot for DBP at 15q24.1 (ICBP GWAS data)  
*COX5A*, *C15orf17*, *MIR4513*, *SCAMP2* were unreported genes in this region with gene-based P value  $< 2.3 \times 10^{-6}$ .



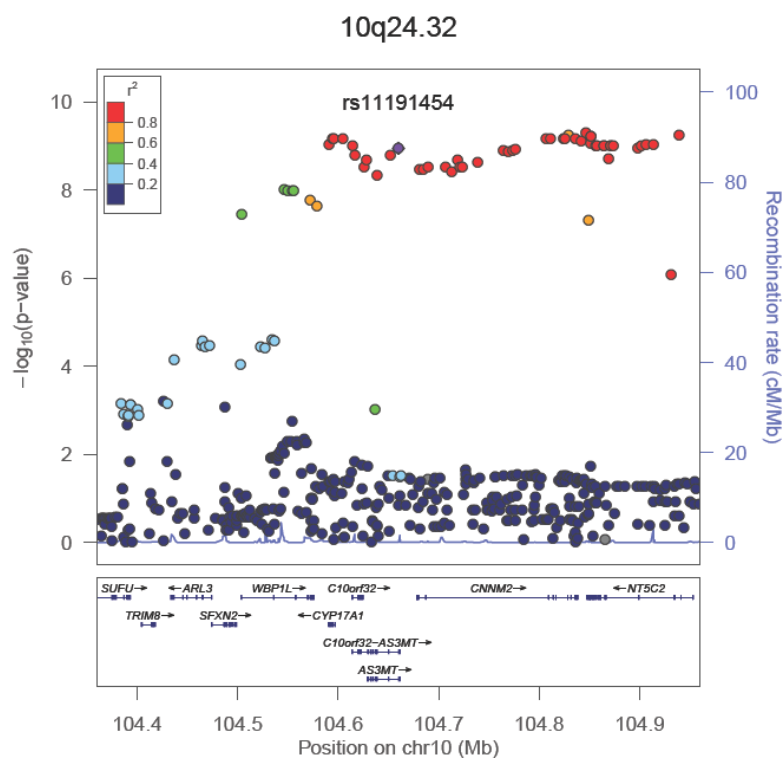

Figure S8 Regional association plot for SBP at 10q24.32 (ICBP GWAS data)  
*C10orf32*, *C10orf26* (*WBP1L*) were unreported genes in this region with gene-based P value <  $2.3 \times 10^{-6}$ .

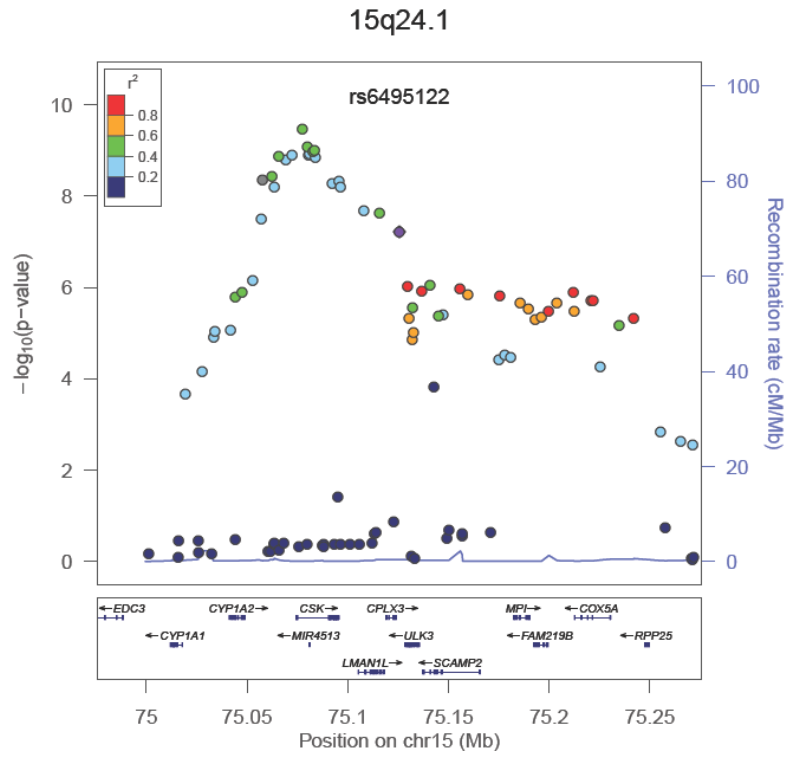

Figure S9 Regional association plot for SBP at 15q24.1 (ICBP GWAS data) *MIR4513* were unreported genes in this region with gene-based P value  $< 2.3 \times 10^{-6}$ .

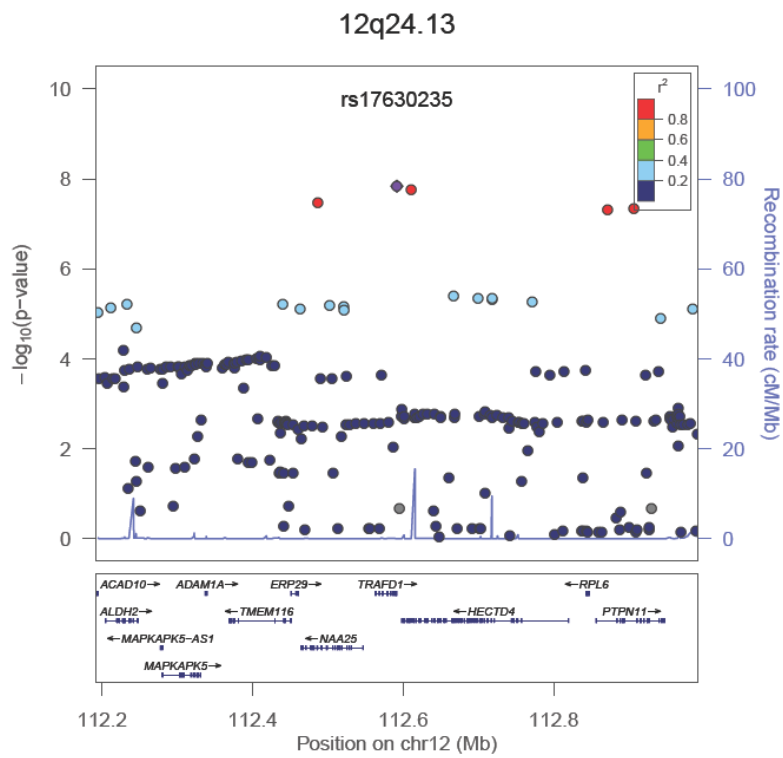

Figure S10 Regional association plot for SBP at 12q24.13 (ICBP GWAS data)  
*NAA25*, *TRAFD1* were unreported genes in this region with gene-based P value  $< 2.3 \times 10^{-6}$ .



Table S2 Information of monogenic syndromes and mouse models for BP-associated genes

| Gene Symbol | OMIM                                         | MGI                                                                                                                                                                                                                                                                                                         | Human Diseases Modeled in Mice                        |
|-------------|----------------------------------------------|-------------------------------------------------------------------------------------------------------------------------------------------------------------------------------------------------------------------------------------------------------------------------------------------------------------|-------------------------------------------------------|
| ACAD10      |                                              |                                                                                                                                                                                                                                                                                                             |                                                       |
| ACBD4       |                                              |                                                                                                                                                                                                                                                                                                             |                                                       |
| ADAM1A      |                                              | Homozygous null mice display male infertility with asthenozoospermia.                                                                                                                                                                                                                                       |                                                       |
| AS3MT       |                                              | Mice homozygous for a null allele have abnormalities in arsenic methylation and in the distribution/retention of orally administered arsenate                                                                                                                                                               |                                                       |
| ATP2B1      |                                              | Homozygous null mice display embryonic lethality                                                                                                                                                                                                                                                            |                                                       |
| ATXN2       | Spinocerebellar ataxia 2 (SCA2) [MIM:183090] | Homozygous mice exhibit an enlarged fat pad, hepatic steatosis and enlarged seminal vesicles. A mild defect in motor learning is seen, but no other notable behavioral or neurological defects are detectable                                                                                               | Spinocerebellar Ataxia 2; SCA2 OMIM: 183090           |
| C10orf107   |                                              |                                                                                                                                                                                                                                                                                                             |                                                       |
| C10orf32    |                                              |                                                                                                                                                                                                                                                                                                             |                                                       |
| C15orf17    |                                              |                                                                                                                                                                                                                                                                                                             |                                                       |
| CLCN6       |                                              | Mice homozygous for a knock-out allele exhibit impaired nociception, mild behavioral abnormalities, and a progressive neuropathy of the central and peripheral nervous systems with features of neuronal ceroid lipofuscinosis (a lysosomal storage disease).                                               | Ceroid Lipofuscinosis, Neuronal, 3; CLN3 OMIM: 204200 |
| CNNM2       | Hypomagnesemia 6 (HOMG6)                     |                                                                                                                                                                                                                                                                                                             |                                                       |
| COX5A       |                                              |                                                                                                                                                                                                                                                                                                             |                                                       |
| CPLX3       |                                              | Mice homozygous for a null allele are fertile, viable and exhibit normal synaptic transmission                                                                                                                                                                                                              |                                                       |
| CSK         |                                              | Homozygotes for targeted null mutations exhibit growth retardation, neural tube defects, and developmental arrest at the 10-12 somite stage. Mutants die between embryonic days nine and ten.                                                                                                               |                                                       |
| CUX2        |                                              | Homozygotes for a targeted null mutation exhibit various neural defects.                                                                                                                                                                                                                                    |                                                       |
| CYP17A1     | Adrenal hyperplasia 5 (AH5) [MIM:202110]     | Homozygous null embryos display early embryonic lethality.                                                                                                                                                                                                                                                  |                                                       |
| CYP1A2      |                                              | Mice homozygous for a null allele display resistance to some signs of TCDD induced toxicity but do not display any gross abnormalities in the absence of treatment.                                                                                                                                         |                                                       |
| FAM109A     |                                              |                                                                                                                                                                                                                                                                                                             |                                                       |
| FES         |                                              | Homozygotes for a null allele show partial in utero lethality, runting, altered hematopoietic homeostasis and macrophage function, skin lesions and susceptibility to bacterial infection. Homozygotes for another null allele show enhanced LPS sensitivity, altered hematopoiesis and larger litter size. |                                                       |
| FGF5        |                                              | Mutations in this gene result in significantly longer pelage hair.                                                                                                                                                                                                                                          |                                                       |

|          |                                                                                                                                                                          |                                                                                                                                                                                                                                                                                                             |                                                                                           |
|----------|--------------------------------------------------------------------------------------------------------------------------------------------------------------------------|-------------------------------------------------------------------------------------------------------------------------------------------------------------------------------------------------------------------------------------------------------------------------------------------------------------|-------------------------------------------------------------------------------------------|
| FURIN    |                                                                                                                                                                          | Homozygous null embryos die at E10.5-E11.5. Embryos homozygous for one knock-out allele show multiple tissue abnormalities including abnormal yolk sac vasculature and chorioallantoic fusion, failure of axial rotation, a kinked neural tube, exencephaly and severe ventral closure and cardiac defects. |                                                                                           |
| HECTD4   |                                                                                                                                                                          |                                                                                                                                                                                                                                                                                                             |                                                                                           |
| HFE      | Hemochromatosis 1 (HFE1) [MIM:235200]; Variegate porphyria (VP) [MIM:176200]; Microvascular complications of                                                             | Mutation of this gene affects iron metabolism. Homozygotes for targeted null mutations exhibit increased intestinal iron absorption and an elevated hepatic iron load but reduced duodenal iron stores. Heterozygotes also accumulate more iron than normal.                                                | Hemochromatosis, Type 1; HFE1 235200                                                      |
| HIST1H1T |                                                                                                                                                                          | Homozygous null mice develop normally and exhibit normal testicular morphology, spermatogenesis and fertility.                                                                                                                                                                                              |                                                                                           |
| HIST1H4C |                                                                                                                                                                          |                                                                                                                                                                                                                                                                                                             |                                                                                           |
| ID1      |                                                                                                                                                                          | Homozygotes for knockout alleles of both Id1 and Id3 exhibit vascular malformations in the forebrain, lack of vascular branching and sprouting in the neuroectoderm, and impaired angiogenesis in transplanted and spontaneous tumors.                                                                      |                                                                                           |
| LMAN1L   |                                                                                                                                                                          |                                                                                                                                                                                                                                                                                                             |                                                                                           |
| MAPKAPK5 |                                                                                                                                                                          | Homozygous mutant mice are viable, fertile, and show no overt abnormalities.                                                                                                                                                                                                                                |                                                                                           |
| MIR3193  |                                                                                                                                                                          |                                                                                                                                                                                                                                                                                                             |                                                                                           |
| MIR4513  |                                                                                                                                                                          |                                                                                                                                                                                                                                                                                                             |                                                                                           |
| MPI      | Congenital disorder of glycosylation 1B (CDG1B) [MIM:602579]                                                                                                             | Homozygous null mice display embryonic lethality during organogenesis, variable abnormalities of the yolk sac and embryonic vasculature, and partial penetrance of abnormal chorioallantoic fusion, placental defects, impaired embryo turning, increased apoptosis, and posterior axial truncations.       |                                                                                           |
| MTHFR    | Methylenetetrahydrofolate reductase deficiency (MTHFRD) [MIM:236250]; Ischemic stroke (ISCHSTR) [MIM:601367]; Folate-sensitive neural tube defects (FS-NTD) [MIM:601634] | Mice homozygous for disruptions in this gene have elevated plasma levels of homocysteine. They also display delayed growth and development and a reduced survival rate.                                                                                                                                     | Human Disease OMIM ID Homocysteinemia 603174 Neural Tube Defects, Folate-Sensitive 601634 |
| NAA25    |                                                                                                                                                                          |                                                                                                                                                                                                                                                                                                             |                                                                                           |
| NPPA     | Atrial fibrillation, familial, 6 (ATFB6) [MIM:612201];                                                                                                                   | Homozygotes are chronically hypertensive partly due to changes in peripheral resistance and increased central AT1-receptor activation, and show salt-sensitive hypertension and abnormal pulmonary vascular remodeling with increased ventricular mass and muscularization of peripheral pulmonary vessels. |                                                                                           |
| NT5C2    |                                                                                                                                                                          |                                                                                                                                                                                                                                                                                                             |                                                                                           |
| PLCD3    |                                                                                                                                                                          |                                                                                                                                                                                                                                                                                                             |                                                                                           |
| PLEKHA7  |                                                                                                                                                                          |                                                                                                                                                                                                                                                                                                             |                                                                                           |

|        |                                                                                                                                                                               |                                                                                                                                                                                                                                                                      |                                                                                                                                                |
|--------|-------------------------------------------------------------------------------------------------------------------------------------------------------------------------------|----------------------------------------------------------------------------------------------------------------------------------------------------------------------------------------------------------------------------------------------------------------------|------------------------------------------------------------------------------------------------------------------------------------------------|
| PTPN11 | LEOPARD syndrome 1 (LEOPARD1) [MIM:151100]; Noonan syndrome 1 (NS1) [MIM:163950]; Leukemia, juvenile myelomonocytic (JMML) [MIM:607785]; Metachondromatosis (MC) [MIM:156250] | Homozygous null mutants exhibit abnormal mesoderm patterning leading to a failure of gastrulation and death by embryonic day 10.5. In heterozygous state the null mutant acts as a dominant enhancer of a mild epidermal growth factor receptor mutation.            | Human Disease<br>OMIM ID<br>Juvenile Myelomonocytic Leukemia; JMML 607785<br>Leopard Syndrome 1; LPRD1 151100<br>Noonan Syndrome 1; NS1 163950 |
| SCAMP2 |                                                                                                                                                                               |                                                                                                                                                                                                                                                                      |                                                                                                                                                |
| SH2B3  | Celiac disease 13 (CELIAC13) [MIM:612011]; Diabetes mellitus, insulin-dependent (IDDM) [MIM:222100]                                                                           | Mice homozygous for a knock-out allele exhibit severe perturbations in hematopoiesis, splenomegaly, and abnormal lymphoid and myeloid homeostasis. Mice homozygous for a different knock-out allele display altered mobility of hematopoietic stem/progenitor cells. |                                                                                                                                                |
| TRAFD1 |                                                                                                                                                                               | Mice homozygous for a null allele exhibit increased susceptibility to endotoxin shock and decreased susceptibility to viral infection.                                                                                                                               |                                                                                                                                                |
| ULK3   |                                                                                                                                                                               |                                                                                                                                                                                                                                                                      |                                                                                                                                                |
| WBP1L  |                                                                                                                                                                               |                                                                                                                                                                                                                                                                      |                                                                                                                                                |

Table S3 Score construction for BP-associated genes

| Gene_Symbol | <i>P - GRAIL</i> < 0.05 | GRAIL candidate | HuGE | OMIM | MGI | STRING | DAPPLE | DAVID | CAD association | Score |
|-------------|-------------------------|-----------------|------|------|-----|--------|--------|-------|-----------------|-------|
| ACAD10      | 0                       | 0               | 1    | 0    | 0   | 0      | 0      | 0     | 0               | 1     |
| ACBD4       | 0                       | 0               | 0    | 0    | 0   | 1      | 0      | 0     | 0               | 1     |
| ADAM1A      | 0                       | 0               | 1    | 0    | 1   | 1      | 0      | 0     | 0               | 3     |
| AS3MT       | 0                       | 0               | 1    | 0    | 1   | 1      | 0      | 0     | 1               | 4     |
| ATP2B1      | 0                       | 1               | 1    | 0    | 1   | 1      | 1      | 0     | 0               | 5     |
| ATXN2       | 0                       | 0               | 1    | 1    | 1   | 1      | 1      | 1     | 1               | 7     |
| C10orf107   | 0                       | 0               | 1    | 0    | 0   | 1      | 0      | 0     | 0               | 2     |
| C10orf32    | 0                       | 0               | 0    | 0    | 0   | 1      | 0      | 0     | 1               | 2     |
| C15orf17    | 0                       | 0               | 0    | 0    | 0   | 0      | 0      | 0     | 0               | 0     |
| CLCN6       | 1                       | 0               | 1    | 0    | 1   | 1      | 0      | 1     | 0               | 5     |
| CNNM2       | 0                       | 0               | 1    | 1    | 0   | 1      | 0      | 0     | 1               | 4     |
| COX5A       | 1                       | 0               | 0    | 0    | 0   | 1      | 1      | 1     | 0               | 4     |
| CPLX3       | 1                       | 1               | 1    | 0    | 1   | 1      | 0      | 0     | 0               | 5     |
| CSK         | 0                       | 0               | 1    | 0    | 1   | 1      | 1      | 0     | 0               | 4     |
| CUX2        | 0                       | 0               | 1    | 0    | 1   | 1      | 0      | 0     | 1               | 4     |
| CYP17A1     | 1                       | 0               | 1    | 1    | 1   | 1      | 1      | 1     | 1               | 8     |
| CYP1A2      | 0                       | 0               | 1    | 0    | 1   | 1      | 1      | 1     | 0               | 5     |
| FAM109A     | 0                       | 0               | 0    | 0    | 0   | 1      | 0      | 0     | 1               | 2     |
| FES         | 0                       | 1               | 1    | 0    | 1   | 1      | 1      | 0     | 0               | 5     |
| FGF5        | 0                       | 1               | 1    | 0    | 1   | 1      | 1      | 0     | 0               | 5     |
| FURIN       | 0                       | 0               | 1    | 0    | 1   | 1      | 1      | 1     | 1               | 6     |
| HECTD4      | 1                       | 0               | 1    | 0    | 0   | 1      | 0      | 0     | 1               | 4     |
| HFE         | 0                       | 0               | 1    | 3    | 1   | 1      | 0      | 1     | 0               | 7     |
| HIST1H1T    | 0                       | 0               | 1    | 0    | 1   | 1      | 0      | 0     | 0               | 3     |
| HIST1H4C    | 0                       | 0               | 1    | 0    | 0   | 1      | 1      | 0     | 0               | 3     |
| ID1         | 1                       | 0               | 0    | 0    | 1   | 1      | 1      | 1     | 0               | 5     |
| LMAN1L      | 0                       | 0               | 1    | 0    | 0   | 1      | 0      | 0     | 0               | 2     |
| MAPKAPK5    | 0                       | 0               | 0    | 0    | 1   | 0      | 1      | 0     | 1               | 3     |
| MIR3193     | 0                       | 0               | 0    | 0    | 0   | 1      | 0      | 0     | 0               | 1     |
| MIR4513     | 0                       | 0               | 0    | 0    | 0   | 1      | 0      | 0     | 0               | 1     |
| MPI         | 0                       | 0               | 0    | 1    | 1   | 1      | 1      | 0     | 0               | 4     |
| MTHFR       | 0                       | 0               | 1    | 3    | 1   | 1      | 0      | 1     | 0               | 7     |
| NAA25       | 0                       | 0               | 1    | 0    | 0   | 1      | 0      | 0     | 1               | 3     |
| NPPA        | 1                       | 1               | 1    | 1    | 1   | 1      | 1      | 1     | 0               | 8     |
| NT5C2       | 0                       | 0               | 1    | 0    | 0   | 1      | 1      | 0     | 1               | 4     |
| PLCD3       | 1                       | 1               | 1    | 0    | 0   | 1      | 0      | 0     | 0               | 4     |
| PLEKHA7     | 0                       | 1               | 1    | 0    | 0   | 1      | 0      | 0     | 0               | 3     |
| PTPN11      | 0                       | 0               | 1    | 4    | 1   | 1      | 1      | 1     | 1               | 10    |
| SCAMP2      | 0                       | 0               | 0    | 0    | 0   | 1      | 1      | 1     | 0               | 3     |
| SH2B3       | 0                       | 0               | 1    | 2    | 1   | 1      | 1      | 0     | 1               | 7     |
| TRAFD1      | 0                       | 0               | 0    | 0    | 1   | 1      | 1      | 0     | 1               | 4     |
| ULK3        | 0                       | 0               | 1    | 0    | 0   | 1      | 1      | 0     | 0               | 3     |
| WBP1L       | 0                       | 0               | 1    | 0    | 0   | 1      | 0      | 0     | 0               | 2     |
