# Supplementary material for: Novel Genes Affecting Blood Pressure Detected Via Gene-Based Association Analysis
Source: PubMed Central journal article supplement (PMC4478534; doi:10.1534/g3.115.016915), 2015-03-26
Supplement: supp_g3.115.016915_FigureS1.pdf [file supp_g3.115.016915_FigureS1.pdf]

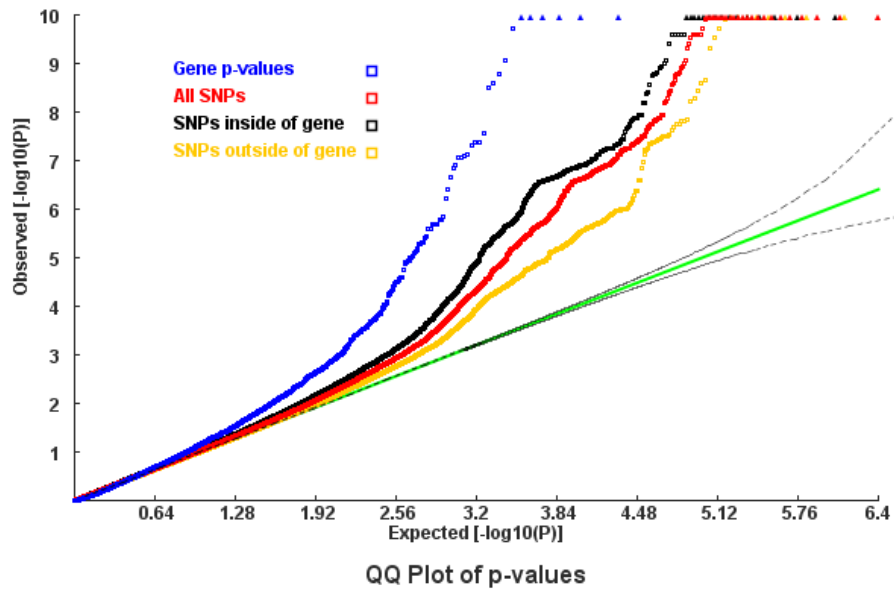

Figure S1 QQ plot of genes and SNPs for DBP (ICBP GWAS data).
