# Supplementary material for: Novel Genes Affecting Blood Pressure Detected Via Gene-Based Association Analysis
Source: PubMed Central journal article supplement (PMC4478534; doi:10.1534/g3.115.016915), 2015-03-26
Supplement: supp_g3.115.016915_FigureS2.pdf [file supp_g3.115.016915_FigureS2.pdf]

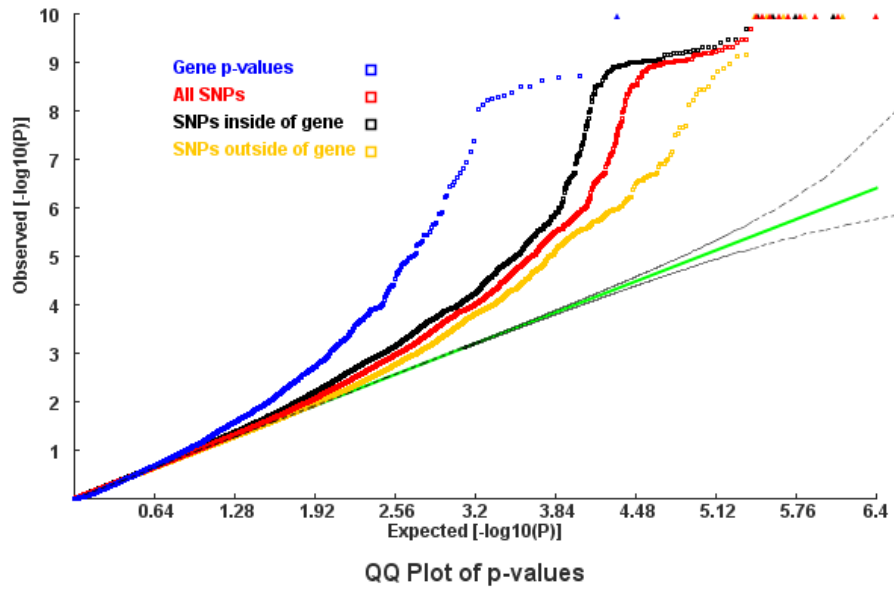

Figure S2 QQ plot of genes and SNPs for SBP (ICBP GWAS data).
