# Supplementary material for: Novel Genes Affecting Blood Pressure Detected Via Gene-Based Association Analysis
Source: PubMed Central journal article supplement (PMC4478534; doi:10.1534/g3.115.016915), 2015-03-26
Supplement: supp_g3.115.016915_FigureS8.pdf [file supp_g3.115.016915_FigureS8.pdf]

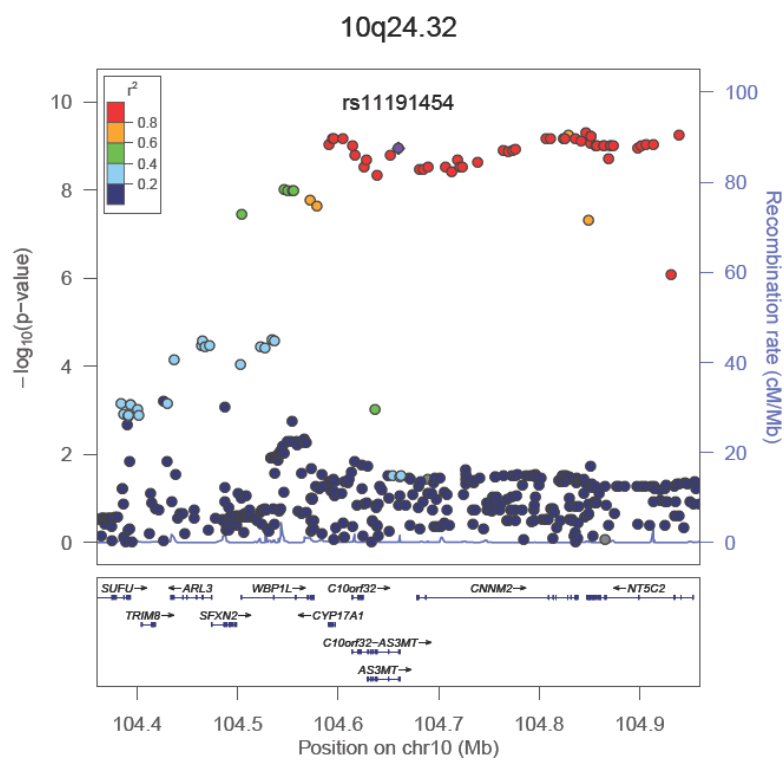

Figure S8 Regional association plot for SBP at 10q24.32 (ICBP GWAS data)  
*C10orf32*, *C10orf26* (*WBP1L*) were unreported genes in this region with gene-based P value <  $2.3 \times 10^{-6}$ .
