# Supplementary material for: Novel Genes Affecting Blood Pressure Detected Via Gene-Based Association Analysis
Source: PubMed Central journal article supplement (PMC4478534; doi:10.1534/g3.115.016915), 2015-03-26
Supplement: supp_g3.115.016915_FigureS10.pdf [file supp_g3.115.016915_FigureS10.pdf]

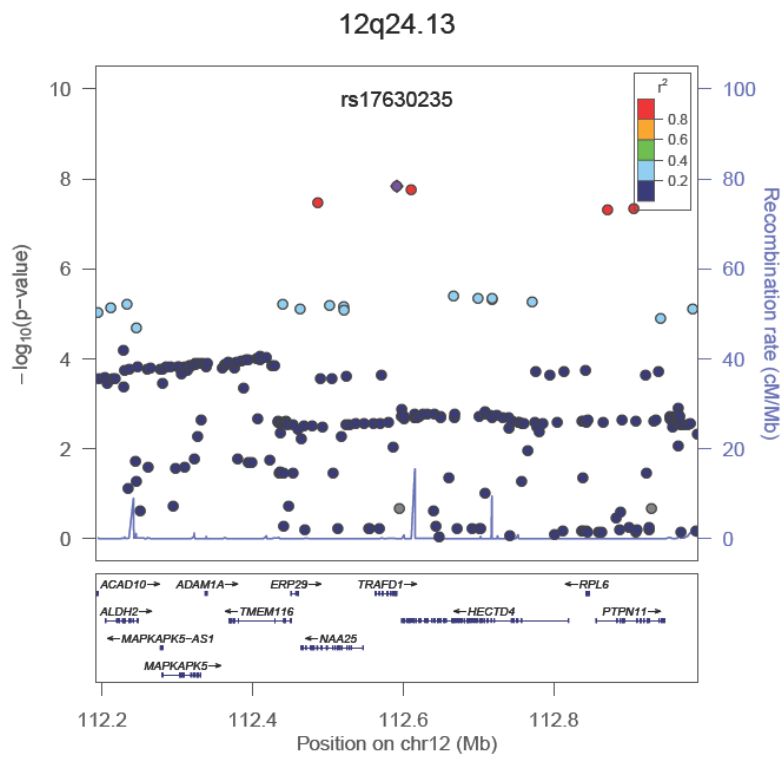

Figure S10 Regional association plot for SBP at 12q24.13 (ICBP GWAS data)  
*NAA25*, *TRAFD1* were unreported genes in this region with gene-based P value  $< 2.3 \times 10^{-6}$ .
