# Supplementary material for: Novel Genes Affecting Blood Pressure Detected Via Gene-Based Association Analysis
Source: PubMed Central journal article supplement (PMC4478534; doi:10.1534/g3.115.016915), 2015-03-26
Supplement: supp_g3.115.016915_TableS3.pdf [file supp_g3.115.016915_TableS3.pdf]

Table S3 Score construction for BP-associated genes

| Gene_Symbol | <i>P - GRAIL</i> <0.05 | GRAIL candidate | HuGE | OMIM | MGI | STRING | DAPPLE | DAVID | CAD association | Score |
|-------------|------------------------|-----------------|------|------|-----|--------|--------|-------|-----------------|-------|
| ACAD10      | 0                      | 0               | 1    | 0    | 0   | 0      | 0      | 0     | 0               | 1     |
| ACBD4       | 0                      | 0               | 0    | 0    | 0   | 1      | 0      | 0     | 0               | 1     |
| ADAM1A      | 0                      | 0               | 1    | 0    | 1   | 1      | 0      | 0     | 0               | 3     |
| AS3MT       | 0                      | 0               | 1    | 0    | 1   | 1      | 0      | 0     | 1               | 4     |
| ATP2B1      | 0                      | 1               | 1    | 0    | 1   | 1      | 1      | 0     | 0               | 5     |
| ATXN2       | 0                      | 0               | 1    | 1    | 1   | 1      | 1      | 1     | 1               | 7     |
| C10orf107   | 0                      | 0               | 1    | 0    | 0   | 1      | 0      | 0     | 0               | 2     |
| C10orf32    | 0                      | 0               | 0    | 0    | 0   | 1      | 0      | 0     | 1               | 2     |
| C15orf17    | 0                      | 0               | 0    | 0    | 0   | 0      | 0      | 0     | 0               | 0     |
| CLCN6       | 1                      | 0               | 1    | 0    | 1   | 1      | 0      | 1     | 0               | 5     |
| CNNM2       | 0                      | 0               | 1    | 1    | 0   | 1      | 0      | 0     | 1               | 4     |
| COX5A       | 1                      | 0               | 0    | 0    | 0   | 1      | 1      | 1     | 0               | 4     |
| CPLX3       | 1                      | 1               | 1    | 0    | 1   | 1      | 0      | 0     | 0               | 5     |
| CSK         | 0                      | 0               | 1    | 0    | 1   | 1      | 1      | 0     | 0               | 4     |
| CUX2        | 0                      | 0               | 1    | 0    | 1   | 1      | 0      | 0     | 1               | 4     |
| CYP17A1     | 1                      | 0               | 1    | 1    | 1   | 1      | 1      | 1     | 1               | 8     |
| CYP1A2      | 0                      | 0               | 1    | 0    | 1   | 1      | 1      | 1     | 0               | 5     |
| FAM109A     | 0                      | 0               | 0    | 0    | 0   | 1      | 0      | 0     | 1               | 2     |
| FES         | 0                      | 1               | 1    | 0    | 1   | 1      | 1      | 0     | 0               | 5     |
| FGF5        | 0                      | 1               | 1    | 0    | 1   | 1      | 1      | 0     | 0               | 5     |
| FURIN       | 0                      | 0               | 1    | 0    | 1   | 1      | 1      | 1     | 1               | 6     |
| HECTD4      | 1                      | 0               | 1    | 0    | 0   | 1      | 0      | 0     | 1               | 4     |
| HFE         | 0                      | 0               | 1    | 3    | 1   | 1      | 0      | 1     | 0               | 7     |
| HIST1H1T    | 0                      | 0               | 1    | 0    | 1   | 1      | 0      | 0     | 0               | 3     |
| HIST1H4C    | 0                      | 0               | 1    | 0    | 0   | 1      | 1      | 0     | 0               | 3     |
| ID1         | 1                      | 0               | 0    | 0    | 1   | 1      | 1      | 1     | 0               | 5     |
| LMAN1L      | 0                      | 0               | 1    | 0    | 0   | 1      | 0      | 0     | 0               | 2     |
| MAPKAPK5    | 0                      | 0               | 0    | 0    | 1   | 0      | 1      | 0     | 1               | 3     |
| MIR3193     | 0                      | 0               | 0    | 0    | 0   | 1      | 0      | 0     | 0               | 1     |
| MIR4513     | 0                      | 0               | 0    | 0    | 0   | 1      | 0      | 0     | 0               | 1     |
| MPI         | 0                      | 0               | 0    | 1    | 1   | 1      | 1      | 0     | 0               | 4     |
| MTHFR       | 0                      | 0               | 1    | 3    | 1   | 1      | 0      | 1     | 0               | 7     |
| NAA25       | 0                      | 0               | 1    | 0    | 0   | 1      | 0      | 0     | 1               | 3     |
| NPPA        | 1                      | 1               | 1    | 1    | 1   | 1      | 1      | 1     | 0               | 8     |
| NT5C2       | 0                      | 0               | 1    | 0    | 0   | 1      | 1      | 0     | 1               | 4     |
| PLCD3       | 1                      | 1               | 1    | 0    | 0   | 1      | 0      | 0     | 0               | 4     |
| PLEKHA7     | 0                      | 1               | 1    | 0    | 0   | 1      | 0      | 0     | 0               | 3     |
| PTPN11      | 0                      | 0               | 1    | 4    | 1   | 1      | 1      | 1     | 1               | 10    |
| SCAMP2      | 0                      | 0               | 0    | 0    | 0   | 1      | 1      | 1     | 0               | 3     |
| SH2B3       | 0                      | 0               | 1    | 2    | 1   | 1      | 1      | 0     | 1               | 7     |
| TRAFD1      | 0                      | 0               | 0    | 0    | 1   | 1      | 1      | 0     | 1               | 4     |
| ULK3        | 0                      | 0               | 1    | 0    | 0   | 1      | 1      | 0     | 0               | 3     |
| WBP1L       | 0                      | 0               | 1    | 0    | 0   | 1      | 0      | 0     | 0               | 2     |
