# Supplementary material for: Novel Genes Affecting Blood Pressure Detected Via Gene-Based Association Analysis
Source: G3 (Bethesda). 2015 Mar 26;5(6):1035–42. doi: 10.1534/g3.115.016915 (PMC4478534; doi:10.1534/g3.115.016915)
Supplement: Supporting Information [file supp_g3.115.016915_TableS1.pdf]

Table S1 Information for the BP-associated genes collected from the HuGE Navigator

| Gene_Symbol | Abortion | AIDS | Adenocarcinoma | Alcoholism | Alzheimer Disease | Amniotic Lateral Sclerosis | Angina | Arsenic Poisoning | Phenopedia | Arthritis, Rheumatoid | Bipolar Disorder | Breast Neoplasms | Cardiovascular Diseases | Celiac Disease | cocaine dependence | Colorectal Neoplasms | COPD | Crohn Disease | Diabetes Mellitus, Type 1 | Diabetes Mellitus, Type 2 | Diabetic Nephropathies | Disease Progression | Down Syndrome | Dyslipidemias | Endometrial Neoplasms | Folic Acid Deficiency | Gout | Graves' disease | Hemochromatosis | Hepatitis | Hypothomocysteinemia | Hypertension | hypothyroidism | Insulin Resistance | Iron Overload | Kidney Failure, Chronic | Leukemia | Liver disease | Lung Neoplasms | Metabolic Diseases | Multiple Sclerosis | Neural Tube Defects | Neonan Syndrome | Obesity | Pancreatic Neoplasms | Parkinson Disease | Prostatic Neoplasms | Schizophrenia | Spinocerebellar Ataxias | Stroke | Thrombosis | Tobacco Use Disorder | Urinary Bladder Neoplasms | Vitiligo |
|-------------|----------|------|----------------|------------|-------------------|----------------------------|--------|-------------------|------------|-----------------------|------------------|------------------|-------------------------|----------------|--------------------|----------------------|------|---------------|---------------------------|---------------------------|------------------------|---------------------|---------------|---------------|-----------------------|-----------------------|------|-----------------|-----------------|-----------|----------------------|--------------|----------------|--------------------|---------------|-------------------------|----------|---------------|----------------|--------------------|--------------------|---------------------|-----------------|---------|----------------------|-------------------|---------------------|---------------|-------------------------|--------|------------|----------------------|---------------------------|----------|
| ACAD10      | Y        |      |                |            |                   |                            |        |                   |            |                       | Y                |                  |                         |                |                    |                      |      |               | Y                         |                           | Y                      |                     |               |               |                       |                       |      |                 |                 |           |                      | Y            |                |                    |               |                         |          |               |                |                    |                    |                     |                 |         |                      |                   |                     |               |                         | Y      |            |                      |                           |          |
| ACBD4       |          |      |                |            |                   |                            |        |                   |            |                       |                  |                  |                         |                |                    |                      |      |               |                           |                           |                        |                     |               |               |                       |                       |      |                 |                 |           |                      |              |                |                    |               |                         |          |               |                |                    |                    |                     |                 |         |                      |                   |                     |               |                         |        |            |                      |                           |          |
| ADAM1A      |          |      |                |            |                   |                            |        |                   |            |                       |                  |                  |                         |                |                    |                      |      |               | Y                         |                           |                        |                     |               |               |                       |                       |      |                 |                 |           |                      |              |                |                    |               |                         |          |               |                |                    |                    |                     |                 |         |                      |                   |                     |               |                         |        |            |                      |                           |          |
| AS3MT       |          |      |                |            |                   |                            |        | Y                 |            |                       |                  | Y                |                         |                |                    |                      |      |               |                           |                           | Y                      |                     |               |               |                       |                       |      |                 |                 |           |                      |              |                |                    |               |                         |          |               |                |                    |                    |                     |                 |         |                      |                   |                     |               |                         |        | Y          |                      |                           |          |
| ATP2B1      |          |      |                |            |                   |                            |        |                   |            |                       |                  | Y                |                         |                |                    |                      |      |               |                           |                           |                        |                     | Y             |               |                       |                       |      |                 |                 |           |                      |              |                |                    |               |                         |          |               |                |                    |                    |                     |                 |         |                      |                   |                     |               |                         |        |            |                      |                           |          |
| ATXN2       |          |      |                |            | Y                 |                            |        |                   |            |                       |                  | Y                |                         |                |                    |                      |      |               |                           |                           |                        |                     |               |               |                       |                       |      |                 |                 |           |                      |              |                |                    |               |                         |          |               |                |                    |                    |                     |                 |         |                      |                   |                     |               |                         |        |            |                      |                           |          |
| C10orf107   |          |      |                | Y          |                   |                            |        |                   |            |                       |                  | Y                |                         |                |                    |                      |      |               |                           |                           | Y                      |                     |               |               |                       |                       |      |                 |                 |           |                      |              |                |                    |               |                         |          |               |                |                    |                    |                     |                 |         |                      |                   |                     |               |                         |        | Y          |                      |                           |          |
| C10orf32    |          |      |                |            |                   |                            |        |                   |            |                       |                  | Y                |                         |                |                    |                      |      |               |                           |                           |                        |                     |               |               |                       |                       |      |                 |                 |           |                      |              |                |                    |               |                         |          |               |                |                    |                    |                     |                 |         |                      |                   |                     |               |                         |        |            |                      |                           |          |
| C15orf17    |          |      |                |            |                   |                            |        |                   |            |                       |                  |                  |                         |                |                    |                      |      |               |                           |                           |                        |                     |               |               |                       |                       |      |                 |                 |           |                      |              |                |                    |               |                         |          |               |                |                    |                    |                     |                 |         |                      |                   |                     |               |                         |        |            |                      |                           |          |
| CLCN6       |          |      |                |            |                   |                            |        |                   |            |                       |                  | Y                |                         |                |                    |                      |      |               |                           |                           | Y                      |                     |               |               |                       |                       |      |                 |                 |           |                      |              |                |                    |               |                         |          |               |                |                    |                    |                     |                 |         |                      |                   |                     |               |                         |        | Y          |                      |                           |          |
| CNNM2       |          |      |                |            | Y                 |                            |        |                   |            |                       |                  | Y                |                         |                |                    |                      |      |               |                           |                           |                        |                     |               |               |                       |                       |      |                 |                 |           |                      |              |                |                    |               |                         |          |               |                |                    |                    |                     |                 |         |                      |                   |                     |               |                         |        | Y          |                      |                           |          |
| COX5A       |          |      |                |            |                   |                            |        |                   |            |                       |                  |                  |                         |                | Y                  |                      |      |               |                           |                           |                        |                     |               |               |                       |                       |      |                 |                 |           |                      |              |                |                    |               |                         |          |               |                |                    |                    |                     |                 |         |                      |                   |                     |               |                         |        | Y          |                      |                           |          |
| CPLX3       |          |      |                |            |                   |                            |        |                   |            |                       |                  |                  |                         |                |                    |                      |      |               |                           |                           |                        |                     |               |               |                       |                       |      |                 |                 |           |                      |              |                |                    |               |                         |          |               |                |                    |                    |                     |                 |         |                      |                   |                     |               |                         |        |            |                      |                           |          |
| CSK         |          |      |                |            |                   |                            |        |                   |            |                       |                  | Y                |                         |                |                    |                      |      |               |                           |                           |                        |                     |               |               |                       |                       |      |                 |                 |           |                      |              |                |                    |               |                         |          |               |                |                    |                    |                     |                 |         |                      |                   |                     |               |                         |        |            |                      |                           |          |
| CUX2        |          |      |                |            |                   |                            |        |                   |            |                       |                  |                  |                         |                |                    |                      |      | Y             | Y                         |                           |                        |                     |               |               |                       |                       |      |                 |                 |           |                      |              |                |                    |               |                         |          |               |                |                    |                    |                     |                 |         |                      |                   |                     |               |                         |        |            |                      |                           |          |
| CYP17A1     |          |      | Y              |            | Y                 |                            |        |                   |            |                       | Y                | Y                |                         |                |                    |                      |      |               |                           | Y                         |                        |                     |               |               |                       | Y                     |      |                 |                 |           |                      |              |                |                    |               |                         |          |               |                |                    |                    |                     |                 |         |                      |                   |                     |               | Y                       |        |            |                      | Y                         |          |
| CYP1A2      |          |      | Y              |            |                   |                            |        |                   |            |                       | Y                | Y                |                         |                |                    | Y                    | Y    |               |                           |                           |                        |                     |               |               |                       | Y                     |      |                 |                 |           |                      |              |                |                    |               |                         |          |               |                |                    |                    |                     |                 |         |                      |                   |                     |               |                         |        |            |                      |                           | Y        |
| FAM109A     |          |      |                |            |                   |                            |        |                   |            |                       |                  |                  |                         |                |                    |                      |      |               |                           |                           |                        |                     |               |               |                       |                       |      |                 |                 |           |                      |              |                |                    |               |                         |          |               |                |                    |                    |                     |                 |         |                      |                   |                     |               |                         |        |            |                      |                           |          |
| FES         |          |      |                |            |                   |                            |        |                   |            |                       |                  | Y                |                         |                |                    |                      |      |               |                           |                           |                        |                     |               |               |                       |                       |      |                 |                 |           |                      |              |                |                    |               |                         |          |               |                |                    |                    |                     |                 |         |                      |                   |                     |               |                         |        |            |                      |                           |          |
| FGF5        |          |      |                | Y          |                   |                            |        |                   |            |                       |                  | Y                |                         |                |                    |                      |      |               |                           |                           |                        |                     |               |               |                       |                       |      |                 |                 |           |                      |              |                |                    |               |                         |          |               |                |                    |                    |                     |                 |         |                      |                   |                     |               |                         |        |            |                      |                           |          |
| FURIN       |          |      |                |            |                   |                            |        |                   |            |                       |                  | Y                |                         |                |                    |                      |      |               |                           |                           |                        |                     |               |               |                       |                       |      |                 |                 |           |                      |              |                |                    |               |                         |          |               |                |                    |                    |                     |                 |         |                      |                   |                     |               |                         |        |            |                      |                           |          |
| HECTD4      |          |      |                |            |                   |                            |        |                   |            |                       |                  |                  |                         |                |                    |                      |      |               |                           |                           |                        |                     |               |               |                       |                       |      |                 |                 |           |                      |              |                |                    |               |                         |          |               |                |                    |                    |                     |                 |         |                      |                   |                     |               |                         |        |            |                      |                           |          |
| HFE         |          |      |                |            | Y                 | Y                          |        |                   |            |                       |                  | Y                |                         |                |                    |                      |      |               |                           |                           |                        |                     |               |               |                       |                       |      |                 |                 |           |                      |              |                |                    |               |                         |          |               |                |                    |                    |                     |                 |         |                      |                   |                     |               |                         |        |            |                      |                           |          |
| HIST1H1T    | Y        |      |                |            |                   |                            |        |                   |            |                       |                  |                  |                         |                |                    |                      |      |               |                           | Y                         |                        |                     |               |               |                       |                       |      |                 |                 |           |                      |              |                |                    |               |                         |          |               |                |                    |                    |                     |                 |         |                      |                   |                     |               |                         |        |            |                      |                           |          |
| HIST1H4C    | Y        |      |                |            |                   |                            |        |                   |            |                       |                  |                  |                         |                |                    |                      |      |               |                           |                           |                        |                     |               |               |                       |                       |      |                 |                 |           |                      |              |                |                    |               |                         |          |               |                |                    |                    |                     |                 |         |                      |                   |                     |               |                         |        |            |                      |                           |          |
| ID1         |          |      |                |            |                   |                            |        |                   |            |                       |                  |                  |                         |                |                    |                      |      |               |                           |                           |                        |                     |               |               |                       |                       |      |                 |                 |           |                      |              |                |                    |               |                         |          |               |                |                    |                    |                     |                 |         |                      |                   |                     |               |                         |        |            |                      |                           |          |
| LMAN1L      |          |      |                |            |                   |                            |        |                   |            |                       |                  |                  |                         |                |                    |                      |      |               |                           |                           |                        |                     |               |               |                       |                       |      |                 |                 |           |                      |              |                |                    |               |                         |          |               |                |                    |                    |                     |                 |         |                      |                   |                     |               |                         |        |            | Y                    |                           |          |
| MAPKAPK5    |          |      |                |            |                   |                            |        |                   |            |                       |                  |                  |                         |                |                    |                      |      |               |                           |                           |                        |                     |               |               |                       |                       |      |                 |                 |           |                      |              |                |                    |               |                         |          |               |                |                    |                    |                     |                 |         |                      |                   |                     |               |                         |        |            |                      |                           |          |
| MIR3193     |          |      |                |            |                   |                            |        |                   |            |                       |                  |                  |                         |                |                    |                      |      |               |                           |                           |                        |                     |               |               |                       |                       |      |                 |                 |           |                      |              |                |                    |               |                         |          |               |                |                    |                    |                     |                 |         |                      |                   |                     |               |                         |        |            |                      |                           |          |
| MIR4513     |          |      |                |            |                   |                            |        |                   |            |                       |                  |                  |                         |                |                    |                      |      |               |                           |                           |                        |                     |               |               |                       |                       |      |                 |                 |           |                      |              |                |                    |               |                         |          |               |                |                    |                    |                     |                 |         |                      |                   |                     |               |                         |        |            |                      |                           |          |
| MPI         |          |      |                |            |                   |                            |        |                   |            |                       |                  |                  |                         |                |                    |                      |      |               |                           |                           |                        |                     |               |               |                       |                       |      |                 |                 |           |                      |              |                |                    |               |                         |          |               |                |                    |                    |                     |                 |         |                      |                   |                     |               |                         |        |            |                      |                           |          |
| MTHFR       | Y        |      |                | Y          | Y                 |                            | Y      |                   | Y          |                       | Y                | Y                |                         | Y              |                    |                      | Y    |               | Y                         | Y                         |                        | Y                   | Y             |               |                       |                       |      |                 |                 |           |                      |              |                |                    |               |                         |          |               |                |                    |                    |                     |                 |         |                      |                   |                     |               |                         |        | Y          |                      |                           |          |
| NAA25       |          |      |                |            |                   |                            |        |                   | Y          | Y                     |                  | Y                |                         |                |                    |                      |      |               |                           | Y                         | Y                      |                     |               |               |                       |                       |      |                 |                 |           |                      |              |                |                    |               |                         |          |               |                |                    |                    |                     |                 |         |                      |                   |                     |               |                         |        |            |                      |                           |          |
| NPPA        |          |      |                |            |                   |                            |        |                   |            |                       |                  | Y                |                         |                |                    |                      |      |               |                           |                           | Y                      |                     |               |               |                       |                       |      |                 |                 |           |                      |              |                |                    |               |                         |          |               |                |                    |                    |                     |                 |         |                      |                   |                     |               |                         |        |            |                      |                           |          |
| NT5C2       |          |      |                |            |                   |                            |        |                   |            |                       |                  | Y                |                         |                |                    |                      |      |               |                           |                           |                        |                     |               |               |                       |                       |      |                 |                 |           |                      |              |                |                    |               |                         |          |               |                |                    |                    |                     |                 |         |                      |                   |                     |               |                         |        |            |                      |                           |          |
| PLCD3       |          |      |                |            |                   |                            |        |                   |            |                       |                  | Y                |                         |                |                    |                      |      |               |                           |                           |                        |                     |               |               |                       |                       |      |                 |                 |           |                      |              |                |                    |               |                         |          |               |                |                    |                    |                     |                 |         |                      |                   |                     |               |                         |        |            |                      |                           |          |
| PLEKHA7     |          |      |                |            |                   |                            |        |                   |            |                       |                  |                  |                         |                |                    |                      |      |               |                           |                           |                        |                     |               |               |                       |                       |      |                 |                 |           |                      |              |                |                    |               |                         |          |               |                |                    |                    |                     |                 |         |                      |                   |                     |               |                         |        |            |                      |                           |          |
| PTPN11      |          |      |                |            |                   |                            |        |                   |            |                       |                  |                  |                         |                |                    |                      |      |               |                           |                           |                        |                     |               |               |                       |                       |      |                 |                 |           |                      |              |                |                    |               |                         |          |               |                |                    |                    |                     |                 |         |                      |                   |                     |               |                         |        |            |                      |                           |          |
| SCAMP2      |          |      |                |            |                   |                            |        |                   |            |                       |                  |                  |                         |                |                    |                      |      |               |                           |                           |                        |                     |               |               |                       |                       |      |                 |                 |           |                      |              |                |                    |               |                         |          |               |                |                    |                    |                     |                 |         |                      |                   |                     |               |                         |        |            |                      |                           |          |
| SH2B3       |          |      |                |            |                   |                            |        |                   |            |                       |                  |                  | Y                       | Y              |                    |                      |      |               |                           |                           |                        |                     |               |               |                       |                       |      |                 |                 |           |                      |              |                |                    |               |                         |          |               |                |                    |                    |                     |                 |         |                      |                   |                     |               |                         |        |            |                      |                           |          |
| TRAFD1      |          |      |                |            |                   |                            |        |                   |            |                       |                  |                  |                         |                |                    |                      |      |               | Y                         |                           |                        |                     |               |               |                       |                       |      |                 |                 |           |                      |              |                |                    |               |                         |          |               |                |                    |                    |                     |                 |         |                      |                   |                     |               |                         |        | Y          |                      |                           |          |
| ULK3        |          |      |                |            |                   |                            |        |                   |            |                       |                  |                  |                         |                |                    |                      |      |               |                           |                           |                        |                     |               |               |                       |                       |      |                 |                 |           |                      |              |                |                    |               |                         |          |               |                |                    |                    |                     |                 |         |                      |                   |                     |               |                         |        |            |                      |                           |          |
| WBP1L       |          |      |                | Y          |                   |                            |        |                   |            |                       |                  |                  |                         |                |                    |                      |      |               |                           |                           |                        |                     |               |               |                       |                       |      |                 |                 |           |                      |              |                |                    |               |                         |          |               |                |                    |                    |                     |                 |         |                      |                   |                     |               |                         |        |            |                      |                           |          |
